# Supplementary material for: Substituent effects in columnar β-diketonate metallomesogens
Source: Royal Society of Chemistry journal article supplement (doi:10.1039/b302858e), 2003-01-01
Supplement: b302858e.doc [file b302858e.doc]

# Supplementary data

**Substituent Effects in Columnar -Diketonate Metallomesogens**

Chih-Wei Chien,a Kwang-Ting Liu*a and Chung K. Lai*b

*a Department of Chemistry, National Taiwan l University, Taipei 106, Taiwan, ROC*

*E-mail:* [*ktliu@ccms.ntu.edu.tw*](mailto:ktliu@ccms.ntu.edu.tw)

*b Department of Chemistry, National Central University, Chung-Li 320, Taiwan, ROC*

E-mail: [cklai@cc.ncu.edu.tw](mailto:cklai@cc.ncu.edu.tw)

Ethyl-2-octyloxybenzene

Yield 81%, yight yellow liquid. 1H-NMR (CDCl3):δ0.87(m, -CH3, 3H), 1.16-1.80(m, -CH2, -CH3, 15H), 2.63(q, J = 7.5 Hz, -CH2, 2H), 3.94(t, J = 6.2 Hz, -OCH2, 2H), 6.83(m, Ar, 2H), 7.13(m, Ar, 2H). 13C-NMR (CDCl3):δ14.08, 14.20, 22.69, 23.39, 26.22, 29.31, 29.42, 31.85, 67.72, 110.93, 120.18, 126.67, 128.88, 132.73, 156.89. IR (Nujol): 2959, 2929, 2859, 1604, 1495, 1456, 1379, 1290, 1243, 1128, 1055, 1045, 749 cm-1. HRMS (FAB) calcd for M+ C16H26O: 234.1984; found: 234.1991.

**3-Methoxy-4-octyloxyacetophenone**

Yield 81%, white solids. 1H-NMR (CDCl3):δ0.82(m, -CH3, 3H), 1.22-1.84(m, -CH2, 12H), 2.50(s, -COCH3, 3H), 3.86(s, ArOCH3, 3H), 4.02(t, J = 6.8 Hz, -OCH2, 2H), 6.81(d, J = 8.3 Hz, Ar, 1H), 7.50(m, Ar, 2H). 13C-NMR (CDCl3):δ13.94, 22.51, 25.80, 28.87, 29.07, 29.21, 31.64, 26.00, 55.89, 68.93, 110.39, 110.96, 123.10, 126.58, 130.12, 149.13, 152.90, 196.53.

**3-Methyl-4-octyloxyacetophenone**

Yield 80%, yellow liquid. 1H-NMR (CDCl3):δ0.87(m, -CH3, 3H), 1.27-1.83(m, -CH2, 12H), 2.23(s, -CH3, 3H), 2.52(s, -COCH3, 3H), 4.00(t, J = 6.5 Hz, -OCH2, 2H), 6.80(d, J = 8.3 Hz, Ar, 1H), 7.77(d, J = 9.0 Hz, Ar, 1H), 7.79(s, Ar, 1H). 13C-NMR (CDCl3):δ13.90, 16.05, 22.48, 25.91, 28.98, 29.06, 29.15, 31.64, 26.01, 67.99, 109.68, 128.26, 130.63, 126.58, 129.37, 161.15, 196.71. IR (Nujol): 2958, 2929, 2858, 1683, 1604, 1513, 1467, 1394, 1361, 1264, 1188, 1149, 1089, 1029, 976, 917, 890, 804, 731, 625, 598 cm-1. HRMS (FAB) calcd. for MH+ C17H27O2: 263.2011; found 263.2013.

**3-Ethyl-4-octyloxyacetophenone**9

Yield 78%, yellow liquid. 1H-NMR (ppm,CDCl3):δ0.87(m, -CH3, 3H), 1.16-1.84(m, -CH2, 15H), 2.53(s, -COCH3, 3H), 2.64(q, J = 7.5 Hz, -CH2, 2H), 4.00(t, J = 6.5 Hz, -OCH2, 2H), 6.81(d, J = 9.2 Hz, Ar, 1H), 7.78(d, J = 7.4 Hz, Ar, 1H), 7.80(s, Ar, 1H). 13C-NMR (ppm, CDCl3):δ13.74, 13.90, 22.48, 23.24, 26.03, 29.00, 29.12, 31.64, 25.94, 67.90, 109.87, 128.30, 129.04, 129.58, 132.52, 160.82, 196.77. IR (Nujol): 2958, 2928, 2858, 1684, 1603, 1502, 1465, 1379, 1357, 1255, 1146, 1135, 1056, 1024, 964, 807, 728, 597 cm-1. HRMS (FAB) calcd for MH+ C17H27O2: 277.2167; found 277.2173.

## Methyl 3-bromo-4-octyloxybenzoate

Yield 83%, light red liquid. 1H-NMR (CDCl3):δ0.87(m, -CH3, 3H), 1.25 - 1.90(m, -CH2, 12H), 3.86(s, -COOCH3, 3H), 4.05(t, J = 6.4 Hz, -OCH2, 2H), 6.85(d, J = 8.6 Hz, Ar, 1H), 7.92(dd, J = 1.7 Hz, 8.6 Hz, Ar, 1H), 8.20(d, J = 1.8 Hz, Ar, 1H).

## Methyl 3-chloro-4-octyloxybenzoate

Yield 90%, pale yellow liquid. 1H-NMR (CDCl3):δ0.86(m, -CH3, 3H), 1.26 - 1.85(m, -CH2, 12H), 3.85(s, -COOCH3, 3H), 4.05(t, J = 6.5 Hz, -OCH2, 2H), 6.89(d, J=8.7 Hz, Ar, 1H), 7.87(dd, J = 2.0 Hz, 8.2 Hz, Ar, 1H), 8.02(d, J = 2.0 Hz, ArH, 1H). 13C-NMR (CDCl3):δ13.50, 22.18, 25.45, 28.51, 28.78, 28.86, 31.36, 51.19, 68.63, 111.34, 129.16, 130.83, 122.07, 122.38, 157.68, 164.77. IR (Nujol): 2957, 2929, 2859, 1727, 1606, 1513, 1474, 1440, 1414, 1381, 1321, 1271, 1208, 1155, 1129, 1069, 1023, 983, 917, 824, 771, 724, 645 cm-1. HRMS (FAB) calcd. for C16H24ClO3: 299.1414; found 299.1399

**Methyl 3-formyl-4-octyloxybenzoate**

Yield 91%, light yellow liquid, yield. 1H-NMR (CDCl3):δ0.85(m, -CH3, 3H), 1.20-1.89(m, -CH2, 12H), 3.88(s, -COOCH3, 3H), 4.13(t, J = 6.5 Hz, -OCH2, 2H), 7.00(d, J = 8.8 Hz, Ar, 1H), 8.19(dd, J = 2.3 Hz, 8.6 Hz, Ar, 1H), 8.48(d, J = 2.3 Hz, Ar, 1H), 10.47(s, -CHO, 1H). 13C-NMR (CDCl3):δ13.87, 22.45, 25.79, 28.76, 29.00, 29.09, 31.58, 51.86), 68.93, 112.15, 130.07, 136.86, 122.42, 124.24, 164.30, 165.78, 188.61. IR (Nujol): 2958, 2926, 2857, 2733, 2375, 1731, 1695, 1608, 1500, 1465, 1379, 1308, 1265, 1208, 1175, 1135, 1029, 996, 937, 844, 771, 724, 671 cm-1. HRMS (FAB) calcd. for MH+ C17H25O4: 293.1753; found 293.1750.

**Methyl 3-formyl-4-hydroxybenzoate**10

The mixture of methyl 4-hydroxybenzoate (15.2 g, 100 mmol), MgCl2 (14.3 g, 150 mmol) and triethylamine (37.9 g, 375 mmol) was stirred in dried acetonitrile (75.0 ml) for 1h. To this solution paraformaldehyde (20.3 g, 225 mmol) dissolved in acetonitrile was slowly added, and the reaction mixture was refluxed for 24 h. The solution was neutralized at ice bath temperature with dilute hydrochloric acid (10%), and then the solution was extracted twice with diethyl ether. The organic layers were collected and dried with anhydrous MgSO4. The product was purified by flash chromatography with ethyl acetate/hexane (1/5). White solids were isolated after recrystallization from THF/CH3OH. Yield 51%, mp 81-83℃. 1H-NMR (CDCl3):δ3.90(s, -COOCH3, 3H), 7.01(d, J = 8.8 Hz, Ar, 1H), 8.17(dd, J = 2.2 and 8.8 Hz, Ar, 1H), 8.30(d, J = 2.2 Hz, Ar, 1H), 9.93(s, Ar, 1H), 11.37(s, ArOH, 1H). 13C-NMR (CDCl3): 51.72, 117.36, 135.61, 137.16, 119.63, 121.76, 164.45, 164.94, 196.04. IR(neat): 1732, 1718, 1656, 1623, 1590, 1488, 1436, 1304, 1287, 1276, 1215, 1180, 1106, 767, 716 cm-1. HRMS (FAB) calcd for MH+ C9H9O4: 181.0501; found 181.0494.

**Methyl 3-cyano-4-octyloxybenzoate**11

Methyl 3-formyl-4-octyloxybenzoate (8.77 g, 30 mmol) and anhydrous pyridine hydrochloric acid (5.20 g, 45 mmol) was mixed in nitroethane and this solution was refluxed for 12h. The solution was extracted with methylene chloride (75.0 ml) and hydrochloric acid (75.0 ml, 0.1 N). The organic layers were collected and dried with anhydrous MgSO4. The product was purified by flash chromatography with ethyl acetate/hexane (1/10). White solid, yield 51%, mp 47-49℃. 1H-NMR (CDCl3):δ0.85(m, -CH3, 3H), 1.27-1.89(m, -CH2, 12H), 3.89(s, -COOCH3, 3H), 4.11(t, J = 6.5 Hz, -OCH2, 2H), 6.97(d, J = 8.8 Hz, Ar, 1H), 8.17(dd, J = 2.1, 8.8 Hz, Ar, 1H), 8.23(d, J = 2.2 Hz, Ar, 1H). 13C-NMR (CDCl3):δ13.66, 22.24, 25.40, 28.39, 28.79, 28.85, 31.37, 51.85, 69.35, 101.75, 111.56, 134.99, 135.41, 114.96, 122.39, 163.42, 164.49. IR (neat): 2954, 2924, 2874, 2855, 2234, 1716, 1609, 1505, 1477, 1471, 1455, 1441, 1303, 1295, 1257, 1201, 1176, 1146, 997, 985, 833, 764 cm-1. HRMS (FAB) calcd. MH+ for C17H24NO4: 290.1756; found 290.1759.

**Methyl 3-Iodo-4-octyloxybenzoate**12

The powder of chromium trioxide (1.87 g, 18.8 mmol) was stirred in 25.0 ml of acetic acid/acetic anhydride (2/3) for 0.5 h under nitrogen atmosphere. The iodine (6.45 g, 25.0 mmol) was then slowly added to the above solution, and the reaction mixture was stirred at room temperature for 3 h. Methyl 4-octyloxybenzoate (14.5 g, 55.0 mmol) was added to the solution and stirred until complete dissolution. To this solution concentrated H2SO4 (1.33 ml, 25mmol) was dropwise added at a temperature under 300C in a water bath. The solution was gently heated at a temperature at 60-650C for 5 h. The solution was poured into crash ice (ca. 200 g). The solution was extracted first with CH2Cl2 (20 ml) and then 3% NaHSO3 (50 ml). The organic layers were collected and dried with anhydrous MgSO4. The product was purified by flash chromatography with CH2Cl2/hexane (1/4). The product was isolated as light yellow liquid. Yield 93%. 1H-NMR (CDCl3):δ0.85(m, -CH3, 3H), 1.26-1.87(m, -CH2, 12H), 3.86(s, -COOCH3, 3H), 4.04(t, J = 6.4 Hz, -OCH2, 2H), 6.76(d, J = 8.6 Hz, Ar, 1H), 7.96(dd, J = 2.0, 8.6 Hz, Ar, 1H), 8.43(d, J = 2.0 Hz, Ar, 1H). 13C-NMR (CDCl3):δ13.84, 22.36, 25.70, 28.64, 28.92, 31.49, 51.62, 69.08, 85.55, 110.32, 131.12, 140.46, 123.57, 160.75, 164.93. IR (Nujol): 2958, 2926, 2858, 1732, 1600, 1465, 1387, 1314, 1265, 1195, 1162, 1122, 1043, 983, 917, 837, 777, 731, 685 cm-1. HRMS (FAB) calcd. for MH+ C16H24IO3: 391.0770; found 391.0754.
